# Supplementary material
Source: MDPI journal article supplement (https://www.mdpi.com/2077-1312/10/2/276)
Supplement: s1 [file s1]

## Supplementary

Table S1: *Pinna nobilis* DNA samples PCR amplified with HapF1-HapR2 primers for Sanger sequencing.

| Sample/ amplicon size | [DNA] (ng/μL) | A <sub>260</sub> /A <sub>280</sub> | Origin                                                   |
|-----------------------|---------------|------------------------------------|----------------------------------------------------------|
| PN4 (300 pb)          | 19,4          | 1,68                               | Faeces                                                   |
| PN9 (300 pb)          | 41,9          | 1,68                               | Necropsy mantle and digestive gland <i>Pinna nobilis</i> |
| PN13 (300 pb)         | 37,6          | 1,81                               |                                                          |
| PN14 (300 pb)         | 56,5          | 1,8                                |                                                          |

Table S2: *Pinna nobilis* DNA samples PCR amplified with COI1-COIL1 primers.

| Sample/ amplicon size | [DNA] (ng/μL) | A <sub>260</sub> /A <sub>280</sub> | Origin                             |
|-----------------------|---------------|------------------------------------|------------------------------------|
| PN1 (710 pb)          | 16,7          | 1,88                               | Mantle biopsy <i>Pinna nobilis</i> |
| PN2 (710 pb)          | 57            | 1,78                               |                                    |
| PN3 (710 pb)          | 37,1          | 1,71                               |                                    |

Table S3: Blast analysis for Sanger sequences obtained from PCR positive *Pinna nobilis* samples

| Sample | Most similar species (BLAST)      | Query Cover | Identity |
|--------|-----------------------------------|-------------|----------|
| PN1    | <i>Pinna nobilis</i> (KY321790.1) | 87%         | 95.77%   |
| PN2    | <i>Pinna nobilis</i> (KY321794.1) | 66%         | 84.14%   |
| PN3    | <i>Pinna nobilis</i> (JX854841.1) | 100%        | 100%     |

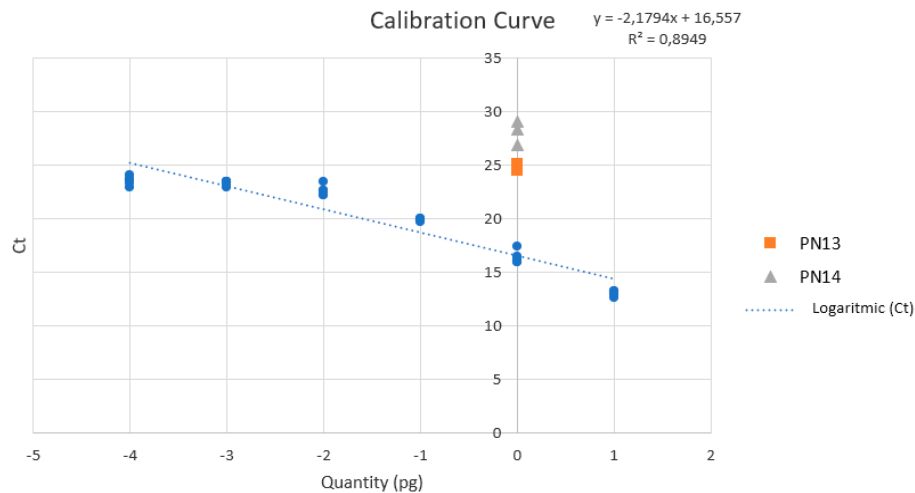

Figure S1: Calibration curve for qPCR for quantification of Haplosporidium pinnae.
